# Supplementary material
Source: Research Square preprint supplement (doi:10.21203/rs.3.rs-10032910/v1)
Supplement: Supplementary file 1 [file 675d91e558ebfd1e55e68f3f.docx]

**Table S1. Distributional Properties and Normality Tests for All Study Variables**

| **Variable** | **Skewness** | **Excess Kurtosis** | **K-S Statistic** | **K-S p-value** | **Distribution** |
| --- | --- | --- | --- | --- | --- |
| **Theory Assignment** | −2.34 | 8.91 | 0.140 | < .001 | Non-normal |
| **PBL Score** | −1.27 | 2.02 | 0.139 | < .001 | Non-normal |
| **PE video Assignment** | −1.30 | 1.80 | 0.164 | < .001 | Non-normal |
| **PE Skills Assessmen t** | −1.92 | 5.29 | 0.165 | < .001 | Non-normal |
| **SP Interview** | −0.59 | 0.01 | 0.117 | < .001 | Non-normal |
| **Written Examination (DV)** | −0.19 | −0.13 | 0.034 | 0.7479 | Normal |
| **Cumulative GPA** | −0.38 | −0.21 | 0.045 | 0.4228 | Normal |

*Note. Excess kurtosis uses Fisher's definition (normal distribution = 0), consistent with SPSS output. K-S = Kolmogorov-Smirnov test against normal distribution. Non-normal distributions (p < .05) for all formative assessment variables justify use of Spearman rank-order correlations in bivariate analyses. Written examination and GPA satisfy normality assumptions (p > .05).*

**Table S2. Full Spearman Rank-Order Correlation Matrix for All Study Variables**

| **Variable** | **Theory** | **PE Video** | **PE Assessment** | **PBL Scores** | **SP Interview** | **Examination** | **GPA** |
| --- | --- | --- | --- | --- | --- | --- | --- |
| Theory Assignment | **1.000** | 0.218*** | 0.183*** | 0.202*** | 0.195*** | 0.190*** | 0.361*** |
| PE Video Assignment | 0.218*** | **1.000** | 0.438*** | 0.202*** | 0.227*** | 0.439*** | 0.350*** |
| PE Skills Assessment | 0.183*** | 0.438*** | **1.000** | 0.210*** | 0.209*** | 0.368*** | 0.362*** |
| PBL Score | 0.202*** | 0.202*** | 0.210*** | **1.000** | 0.199*** | 0.440*** | 0.356*** |
| SP Interview | 0.195*** | 0.227*** | 0.209*** | 0.199*** | **1.000** | 0.346*** | 0.470*** |
| Written Examination | 0.190*** | 0.439*** | 0.368*** | 0.440*** | 0.346*** | **1.000** | **0.638***** |
| Cumulative GPA | 0.361*** | 0.350*** | 0.362*** | 0.356*** | 0.470*** | **0.638***** | **1.000** |

| *Note. Values are Spearman rank-order correlation coefficients. Red shading = |ρ| ≥ .60; amber shading = |ρ| ≥ .40. *** p < .001 ** p < .01 * p < .05.* |
| --- |
