# Supplementary material
Source: Research Square preprint supplement (doi:10.21203/rs.3.rs-10032910/v1)
Supplement: Supplementary file 2 [file 845a3aec56e075ce969cbb9e.docx]

**Supplementary File 2**

**PE Video Assignment Rubric — Generic Physical Examination Assessment**

*Diagnostic Medicine | Guangdong Medical University | Applicable to all PE video submissions in the course*

Instructions: Faculty reviewer rates each dimension based on the submitted video recording. The same rubric applies to all physical examination techniques assessed in this course (cardiovascular, respiratory, abdominal, neurological, and musculoskeletal examinations). Written feedback is recorded in the learning management platform and made available to the student asynchronously within one week of submission.

| **Assessment Dimension** | **Excellent** | **Satisfactory** | **Needs Improvement** | **Score** |
| --- | --- | --- | --- | --- |
| **1. Procedural Completeness**  (20 pts) | (18–20) All required steps of the PE technique are performed; no critical steps are omitted; sequence is correct. | (12–17) Most steps are performed; one or two non-critical steps omitted or out of sequence. | (0–11) Multiple steps missing or performed in incorrect order; critical steps omitted. |  |
| **2. Technical Accuracy and Hand Technique**  (25 pts) | (22–25) Technique is consistently correct; hand placement, pressure, and movement are accurate and smooth throughout. | (15–21) Technique is mostly correct; minor errors in hand placement or pressure that do not substantially compromise the examination. | (0–14) Technique contains significant errors that would affect examination validity or patient safety. |  |
| **3. Clinical Communication During Examination**  (15 pts) | (13–15) Explains each step clearly to the patient; obtains appropriate consent; demonstrates professional and empathetic communication throughout. | (9–12) Communication is generally adequate; some steps not explained, or minor lapses in professional conduct. | (0–8) Minimal or absent patient communication; unprofessional conduct evident. |  |
| **4. Interpretation and Verbal Reporting**  (20 pts) | (18–20) Accurately describes findings during or after the examination; uses correct clinical terminology; interpretation is clinically appropriate. | (12–17) Describes most findings correctly; minor errors in terminology or clinical interpretation. | (0–11) Significant errors in describing findings; incorrect terminology or clinically inappropriate interpretation. |  |
| **5. Video Submission Quality and Reflective Engagement**  (20 pts) | (18–20) Video is complete, clearly filmed, and well-framed; student demonstrates awareness of camera positioning to show technique; submission is timely. | (12–17) Video is adequate for assessment purposes with minor issues (e.g., partial framing, brief audio problems); submitted on time. | (0–11) Video quality substantially impairs assessment; key steps not visible; or submission is late without justification. |  |
| **Total Score** | | | | **/ 100** |

Reviewer (faculty) name: _______________________________ Date of review: _______________ Student name: ___________________________ PE technique assessed: _______________________________

Written feedback provided via platform: ☐ Yes ☐ No

*Note. This rubric was developed by the Diagnostic Medicine course team at Guangdong Medical University for formative assessment of video-recorded physical examination (PE) performance within a programmatic assessment framework. It assesses the procedural domain of clinical competence. A single generic rubric is used across all PE techniques to ensure consistency of assessment standards. Scores are recorded by faculty via the course online learning management platform. The rubric was used throughout the 2024–2025 academic year for the cohort described in the main manuscript.*
