# Supplementary material
Source: Research Square preprint supplement (doi:10.21203/rs.3.rs-10032910/v1)
Supplement: Supplementary file 3 [file a871868812e9ace32e4d4ef2.docx]

**Supplementary File 1**

**PBL Formative Assessment Rubric — Diagnostic Medicine**

*Guangdong Medical University | Undergraduate Diagnostic Medicine Course | Academic Year 2024–2025*

**Purpose:** This rubric is used by tutors to rate individual students during problem-based learning (PBL) case-discussion sessions in the Diagnostic Medicine course. It assesses three cognitive competency domains aligned with the course learning objectives and the programmatic assessment framework described in the main manuscript: **knowledge acquisition (Dimension 1), clinical reasoning (Dimension 2), and problem-solving (Dimension 3).** Dimensions 4–5 assess knowledge synthesis depth and higher-order collaborative thinking. Scores are entered by the assigned tutor directly into the course online learning management platform immediately after each session.

**Instructions:** Select the performance level that best matches the student’s demonstrated behaviour during the session. Record the numerical score within the stated range in the Score column. Feedback should be provided verbally during the session and, where applicable, supplemented with written comments via the platform.

| **Assessment Dimension & Construct** | **Excellent (90–100%)** | **Proficient (70–89%)** | **Developing (50–69%)** | **Beginning (<50%)** | **Score** |
| --- | --- | --- | --- | --- | --- |
| **1. Clinical Knowledge Mastery and Application** (25 pts) | | | | | |
| **Construct:** *Assesses the depth and accuracy of diagnostic medicine knowledge activated during case discussion, and the student's ability to link that knowledge to the clinical scenario. This dimension maps directly to the knowledge acquisition construct and is the strongest predictor of written examination performance.* | | | | | |
| **Performance Levels & Behavioural Anchors** | **(23–25)** *Demonstrates comprehensive, accurate knowledge with seamless clinical application.*  • Recalls and accurately applies core diagnostic medicine concepts (pathophysiology, clinical presentation, investigation interpretation) without prompting.  • Connects theoretical knowledge to specific case details; identifies clinically relevant patterns.  • Distinguishes clinically significant from incidental findings with justification.  • Uses precise, discipline-appropriate terminology throughout. | **(18–22)** *Demonstrates sound knowledge with mostly accurate application; minor gaps present.*  • Applies most relevant concepts correctly; occasional minor factual error or omission.  • Generally connects knowledge to the case, though some links require prompting.  • Identifies most clinically significant findings; minor lapses in discrimination.  • Terminology is mostly accurate with occasional imprecision. | **(13–17)** *Demonstrates partial knowledge; application is inconsistent or requires substantial support.*  • Recalls basic concepts but has notable gaps in diagnostic knowledge relevant to the case.  • Application to case details is incomplete or requires significant tutor prompting.  • Struggles to distinguish clinically significant from incidental findings.  • Terminology is sometimes inaccurate or inconsistently applied. | **(0–12)** *Demonstrates limited knowledge; application to the clinical case is largely absent.*  • Significant factual gaps or errors in core diagnostic medicine knowledge.  • Unable to connect knowledge to the case without extensive guidance.  • Cannot identify clinically significant findings reliably.  • Terminology is frequently incorrect or absent. |  |
| **2. Clinical Information Integration and Diagnostic Reasoning** (25 pts) | | | | | |
| **Construct:** *Evaluates the student's ability to synthesise history, physical examination findings, and investigation results into a coherent diagnostic argument. This dimension reflects the clinical reasoning construct central to the programmatic assessment framework and aligns with the higher-order analytical demands of the written examination.* | | | | | |
| **Performance Levels & Behavioural Anchors** | **(23–25)** *Integrates multiple data streams into a well-structured, accurate diagnostic argument.*  • Systematically synthesises history, examination, and investigative data without omission.  • Constructs a clear, logical reasoning chain from clinical data to diagnostic conclusion.  • Identifies inconsistencies in the clinical picture and addresses them explicitly.  • Recognises and articulates the diagnostic significance of positive and negative findings. | **(18–22)** *Integrates most data streams coherently; reasoning chain is mostly sound with minor gaps.*  • Synthesises most relevant clinical data; occasionally misses one data stream.  • Reasoning chain is generally logical; minor leap or gap without full justification.  • Identifies most clinically significant inconsistencies; may not fully resolve them.  • Recognises significance of most positive findings; less consistent with negative findings. | **(13–17)** *Partial integration; reasoning is incomplete or relies heavily on tutor scaffolding.*  • Integrates some clinical data but analysis is fragmented or compartmentalised.  • Reasoning chain has notable gaps; conclusions are partially supported.  • Identifies obvious inconsistencies but cannot reliably address them.  • Recognises significance of salient findings only; misses subtler clinical clues. | **(0–12)** *Little to no coherent integration; reasoning is absent or substantially incorrect.*  • Presents clinical data in isolation without meaningful synthesis.  • Reasoning chain is absent, circular, or based on incorrect premises.  • Unable to identify clinically important inconsistencies.  • Cannot reliably assign diagnostic significance to clinical findings. |  |
| **3. Problem-Solving and Differential Diagnosis** (20 pts) | | | | | |
| **Construct:** *Assesses the student's capacity to generate, compare, and prioritise a differential diagnosis, and to propose a rational investigative or management plan. This dimension operationalises the problem-solving construct and corresponds to the higher-order cognitive items on the written examination.* | | | | | |
| **Performance Levels & Behavioural Anchors** | **(18–20)** *Generates a well-reasoned, prioritised differential and proposes a logical next step.*  • Generates a comprehensive, clinically appropriate differential diagnosis (3 or more conditions).  • Prioritises the differential based on explicit clinical evidence from the case.  • Proposes confirmatory investigations or management steps with clear rationale.  • Anticipates how additional findings would revise the differential. | **(14–17)** *Generates a reasonable differential with mostly sound prioritisation; minor gaps in rationale.*  • Generates an adequate differential (2–3 conditions); may miss one relevant diagnosis.  • Prioritisation is generally appropriate; rationale is partially stated.  • Proposes reasonable next steps; justification may be incomplete.  • Considers how key findings would modify the differential, though incompletely. | **(10–13)** *Differential is limited; prioritisation and rationale require substantial prompting.*  • Generates only 1–2 diagnoses; list is incomplete or includes low-probability conditions.  • Prioritisation is arbitrary or not linked to clinical evidence.  • Proposed next steps are vague, generic, or require significant tutor input.  • Does not consider how additional findings would change the differential. | **(0–9)** *Unable to generate or justify a meaningful differential diagnosis.*  • Cannot generate a clinically relevant differential diagnosis independently.  • No meaningful prioritisation; list (if given) is random or clinically inappropriate.  • Cannot propose rational investigative or management steps.  • Does not engage with the concept of diagnostic revision. |  |
| **4. Evidence-Based Reasoning and Knowledge Synthesis** (15 pts) | | | | | |
| **Construct:** *Evaluates whether the student can support clinical decisions with relevant mechanistic understanding, epidemiological considerations, or guideline-based evidence. This dimension captures the breadth and depth of knowledge integration that distinguishes surface from deep learning, and supports the programmatic assessment goal of assessing durable, transferable competence.* | | | | | |
| **Performance Levels & Behavioural Anchors** | **(14–15)** *Consistently grounds clinical reasoning in relevant mechanisms, evidence, or guidelines.*  • Explains the pathophysiological mechanism underlying key signs and symptoms.  • References relevant epidemiological data (prevalence, risk factors) appropriately.  • Cites or demonstrates awareness of applicable diagnostic criteria or clinical guidelines.  • Integrates basic science knowledge (anatomy, physiology) coherently with clinical content. | **(11–13)** *Generally supports reasoning with evidence or mechanisms; occasional gaps.*  • Explains pathophysiology for most key findings; gaps in less common conditions.  • Uses epidemiological context appropriately in most instances.  • Aware of diagnostic criteria or guidelines; application may be incomplete.  • Integrates basic science knowledge with some reliance on prompting. | **(8–10)** *Evidence or mechanistic reasoning is present but partial or superficial.*  • Provides basic mechanistic explanation for obvious findings; struggles with complex ones.  • Limited use of epidemiological reasoning.  • Mentions diagnostic criteria or guidelines only when prompted.  • Basic science integration is superficial or inconsistently connected to clinical content. | **(0–7)** *Little or no evidence-based or mechanistic reasoning demonstrated.*  • Cannot explain the mechanism underlying clinical findings.  • Does not use epidemiological reasoning.  • Unaware of or unable to apply diagnostic criteria or guidelines.  • Basic science knowledge is not connected to clinical content. |  |
| **5. Critical Thinking and Contribution to Group Knowledge Construction** (15 pts) | | | | | |
| **Construct:** *Assesses the student's capacity for higher-order thinking within the PBL group, including questioning assumptions, responding to challenge, and actively contributing to the shared construction of clinical knowledge. This dimension reflects the collaborative and metacognitive dimensions of programmatic assessment and captures learning behaviours not assessed by written examination alone.* | | | | | |
| **Performance Levels & Behavioural Anchors** | **(14–15)** *Consistently demonstrates higher-order thinking and substantively advances group reasoning.*  • Identifies assumptions or logical gaps in peers' reasoning and articulates them clearly.  • Responds to challenging questions with well-reasoned, evidence-informed answers.  • Poses clinically meaningful questions that deepen the group's exploration of the case.  • Synthesises contributions from multiple peers into a more coherent collective understanding. | **(11–13)** *Engages critically with group discussion; contributions are mostly substantive.*  • Identifies some assumptions or gaps in reasoning; articulation may be incomplete.  • Responds adequately to most questions; occasional difficulty with complex challenges.  • Poses relevant questions, though depth may be limited.  • Contributes to group understanding; synthesis across peers is partial. | **(8–10)** *Participates in discussion but critical contribution is limited or reactive.*  • Rarely identifies assumptions or gaps without prompting.  • Struggles to respond to challenging questions; answers are superficial.  • Poses questions mainly for clarification rather than to advance reasoning.  • Contribution to group knowledge is minimal or largely passive. | **(0–7)** *Minimal participation; no meaningful critical or collaborative contribution evident.*  • Does not identify assumptions or reasoning gaps.  • Unable to respond meaningfully to challenge; defers entirely to others.  • Does not pose clinically relevant questions.  • Does not contribute to group knowledge construction. |  |
| **Total Score (100 pts maximum)** | | | | | **/ 100** |

**Session details**

Student name: _______________________________________ Tutor name: _______________________________________ Date: _______________ Case title: _______________________________________ Group no.: _______

Feedback provided: ☐ Verbally during session ☐ Written via platform ☐ Both

Student signature (acknowledging receipt of feedback): _______________________________________ Date: _______________

***Note.*** *This rubric was developed by the Diagnostic Medicine course team at Guangdong Medical University for the purpose of formative assessment within a programmatic assessment framework. The rubric was revised from the original course instrument to more explicitly operationalise the cognitive competency constructs under investigation in the associated manuscript (Liu et al., 2025). The original instrument included additional administrative criteria (homework submission, presentation aesthetics) that were retained for course management purposes but are not part of the PBL score variable analysed in the study. The five dimensions above constitute the cognitive assessment construct as used in the validity analysis.*
